# Supplementary material for: Effects of Both Preemption and Entrenchment in the Retreat from Verb Overgeneralization Errors: Four Reanalyses, an Extended Replication, and a Meta-Analytic Synthesis
Source: Oxford University Press journal article supplement (doi:10.1525/collabra.133), 2018-01-01
Supplement: collabra-4-133-s1.xlsx [file collabra-4-133-s1.xlsx]

## Sheet: A1_Correlations
Figure Locatives												Ground Locatives												Locatives Difference Scores
	PRE_CHI	ENT_CHI	Manner	End_State	SSplattering	SJoining	SStacking	SGluing	SSmearing				PRE_CHI	ENT_CHI	Manner	End_State	SSplattering	SJoining	SStacking	SGluing	SSmearing				PRE_CHI	ENT_CHI	Manner	End_State	SSplattering	SJoining	SStacking	SGluing	SSmearing
PRE_CHI	1											PRE_CHI	1											PRE_CHI	1
ENT_CHI	0.81	1										ENT_CHI	0.76	1										ENT_CHI	0.79	1
Manner	0.18	0.04	1									Manner	-0.18	-0.24	1									Manner	0	-0.1	1
End_State	-0.32	-0.05	-0.19	1								End_State	0.32	0.46	-0.19	1								End_State	0	0.2	-0.19	1
SSplattering	-0.06	-0.06	0.56	-0.12	1							SSplattering	0.06	-0.06	0.56	-0.12	1							SSplattering	0	-0.06	0.56	-0.12	1
SJoining	-0.03	0.18	-0.08	0.36	-0.15	1						SJoining	0.03	0.17	-0.08	0.36	-0.15	1						SJoining	0	0.17	-0.08	0.36	-0.15	1
SStacking	-0.09	-0.2	0.01	0.18	0.02	-0.05	1					SStacking	0.09	0.12	0.01	0.18	0.02	-0.05	1					SStacking	0	-0.04	0.01	0.18	0.02	-0.05	1
SGluing	0.47	0.53	0.04	0.01	0	0.17	-0.15	1				SGluing	-0.47	-0.28	0.04	0.01	0	0.17	-0.15	1	-0.02			SGluing	0	0.12	0.04	0.01	0	0.17	-0.15	1
SSmearing	-0.12	-0.15	-0.05	-0.15	-0.17	-0.01	-0.17	-0.02	1			SSmearing	0.12	0.16	-0.05	-0.15	-0.17	-0.01	-0.17	-0.02	1			SSmearing	0	0	-0.05	-0.15	-0.17	-0.01	-0.17	-0.02	1
DO Datives																								Datives Difference Scores
	PRE_CHI	ENT_DO	BROAD_PO	BROAD_DO_1	BROAD_DO_2	SPEECH	MAILING	BEQUEATHING	MOTION	LATINATE			PRE_CHI	ENT_PO	BROAD_PO	BROAD_DO_1	BROAD_DO_2	SPEECH	MAILING	BEQUEATHING	MOTION	LATINATE			PRE_CHI	ENT_CHI	BROAD_PO	BROAD_DO_1	BROAD_DO_2	SPEECH	MAILING	BEQUEATHING	MOTION	LATINATE
PRE_CHI	1											PRE_CHI	1											PRE_CHI	1
ENT_DO	0.81	1										ENT_PO	-0.24	1										ENT_CHI	0.42	1
BROAD_PO	-0.17	-0.04	1									BROAD_PO	0.17	-0.37	1									BROAD_PO	0.17	-0.19	1
BROAD_DO_1	0.12	0.3	0.49	1								BROAD_DO_1	-0.12	-0.43	0.49	1								BROAD_DO_1	-0.12	-0.47	0.49	1
BROAD_DO_2	0.2	0.06	-0.58	-0.21	1							BROAD_DO_2	-0.2	0.32	-0.58	-0.21	1							BROAD_DO_2	-0.2	0.15	-0.58	-0.21	1
SPEECH	0.42	0.37	-0.53	0.27	0.47	1						SPEECH	-0.42	0.17	-0.53	0.27	0.47	1						SPEECH	-0.42	-0.16	-0.53	0.27	0.47	1
MAILING	0.11	0.25	0.53	0.62	-0.49	0.13	1					MAILING	-0.11	-0.33	0.53	0.62	-0.49	0.13	1					MAILING	-0.11	-0.37	0.53	0.62	-0.49	0.13	1
BEQUEATHING	0.11	0.3	0.08	0.28	0.07	-0.05	-0.04	1				BEQUEATHING	-0.11	-0.45	0.08	0.28	0.07	-0.05	-0.04	1				BEQUEATHING	-0.11	-0.47	0.08	0.28	0.07	-0.05	-0.04	1
MOTION	-0.05	-0.24	0.27	-0.26	0.12	-0.31	-0.13	-0.18	1			MOTION	0.05	0.26	0.27	-0.26	0.12	-0.31	-0.13	-0.18	1			MOTION	0.05	0.32	0.27	-0.26	0.12	-0.31	-0.13	-0.18	1
LATINATE	0.09	0.1	-0.06	0.34	0.19	0.36	0.26	0.27	-0.01	1		LATINATE	-0.09	-0.21	-0.06	0.34	0.19	0.36	0.26	0.27	-0.01	1		LATINATE	-0.09	-0.19	-0.06	0.34	0.19	0.36	0.26	0.27	-0.01	1
Various constructions (raw scores)																								Various constructions (difference scores)
	PRE_CHI	ENT_CHI																							PRE_CHI	ENT_CHI
PRE_CHI	1																							PRE_CHI	1	0.78
ENT_CHI	0.81	1																						ENT_CHI	0.78	1
Un- Prefixation (raw scores; difference scores are the same as the PRE/ENT predictors are only ever calculated for un- forms ast the target)
	PRE_CHI	ENT_CHI	Bare	Rever	Semantics
PRE_CHI	1
ENT_CHI	0.66	1
Bare	0	-0.14	1
Rever	-0.04	-0.18	0.11	1
Semantics	0.3	0.64	-0.06	-0.02	1
New Un- Prefixation study (raw scores; difference scores are the same as the PRE/ENT predictors are only ever calculated for un- forms ast the target). 60 Verbs with CA
	PRE_CHI	ENT_CHI	Zero	Rever	Semantics
PRE_CHI	1
ENT_CHI	0.82	1
Bare	0	-0.01	1	0.01
Rever	0.17	0.25	0.01	1
Semantics	0.42	0.54	0.03	0.36	1
New Un-Prefixation study. All 160 verbs (for Preemption analysis)
	Has_CA	ENT_CHI	Bare	Rever	Semantics
PRE_Has_CA	1
ENT_CHI	-0.33	1
Bare	0.12	-0.12	1
Rever	0.24	0.39	0	1
Semantics	-0.07	0.58	-0.04	0.46	1
New Un-Prefixation study. 100 No_CA Verbs only (for Entrenchment analysis)
	ENT_CHI	Zero	Rever	Semantics
ENT_CHI	1
Bare	-0.11	1
Rever	0.58	-0.04	1
Semantics	0.62	-0.05	0.55	1

## Sheet: A2_Model_Comparisons
	Age 5-6 Figure Locatives					Age 9-10 Figure Locatives					Adults Figure Locatives				Fig1
Predictor	AIC	ChiSq	p(Chi)	Sig		AIC	ChiSq	p(Chi)	Sig		AIC	ChiSq	p(Chi)	Sig
Full Model	3267.6					3020					6052.2
PRE_CHI	3283.9	18.3425	1.845e-05	***		3039	21.0125	4.563e-06	***		6081.9	31.691	1.808e-08	***	Fig2
ENT_CHI	3274.8	9.2158	0.002399	**		3021.9	3.8394	0.05006	.		6059.9	9.702	0.0018411	**	Fig3
Manner	3266.7	1.149	0.283761			3021.6	3.6164	0.05721	.		6063.4	13.156	0.0002866	***	Fig4
End_State	3266.3	0.672	0.412351			3019.9	1.8571	0.17296			6058.4	8.17	0.0042583	**	Fig5
SSplattering	3265.6	0.0061	0.937663			3019.8	1.8019	0.17948			6052.1	1.828	0.176395
SJoining	3266.5	0.9256	0.336006			3018.1	0.0326	0.85675			6052.9	2.708	0.0998413	.
SStacking	3267.5	1.9084	0.167136			3018.4	0.3529	0.55249			6050.2	0.006	0.939394
SGluing	3267	1.4514	0.228297			3021.2	3.1299	0.07687	.		6056.9	6.689	0.0096992	**	Fig6
SSmearing	3268.8	3.2228	0.07262	.		3019.9	1.8516	0.17359			6055.3	5.114	0.0237307	*	Fig7
	Age 5-6 Ground Locatives					Age 9-10 Ground Locatives					Adults Ground Locatives				Fig1
Predictor	AIC	ChiSq	p(Chi)	Sig		AIC	ChiSq	p(Chi)	Sig		AIC	ChiSq	p(Chi)	Sig
Full Model	3351.4					3204.9					6417.2
PRE_CHI	3357.6	8.1914	0.004209	**		3229.7	26.7894	2.269e-07	***		6437.6	22.3735	2.245e-06	***	Fig2
ENT_CHI	3349.4	0.0062	0.937474			3203.2	0.3377	0.56113			6415.6	0.4232	0.5154		Fig3
Manner	3355.2	5.7905	0.016113	*		3203.1	0.211	0.64595			6416.5	1.3582	0.2439		Fig4
End_State	3349.4	0.0107	0.917547			3202.9	0.0217	0.88297			6415.7	0.4804	0.4883		Fig5
SSplattering	3350.3	0.911	0.339858			3204.4	1.522	0.21731			6416.3	1.1517	0.2832
SJoining	3349.9	0.4701	0.492955			3203	0.0995	0.75245			6415.3	0.0635	0.801
SStacking	3349.5	0.0597	0.807029			3205.7	2.7963	0.09448	.		6417.5	2.3129	0.1283
SGluing	3350.5	1.0708	0.300769			3203.2	0.3344	0.56309			6415.9	0.7074	0.4003		Fig6
SSmearing	3349.4	0.0065	0.935644			3206.6	3.6496	0.05608	.		6415.3	0.0745	0.7848		Fig7
	Age 5-6 Locative Difference Scores					Age 9-10 Locative Difference Scores					Adults Locative Difference Scores				Fig8
Predictor	AIC	ChiSq	p(Chi)	Sig		AIC	ChiSq	p(Chi)	Sig		AIC	ChiSq	p(Chi)	Sig
Full Model	3880.4					3772.5					7248.2
PRE_CHI	3882.1	3.6907	0.05472	.		3775.1	4.5877	0.0322	*		7258.5	12.3001	0.0004529	***
ENT_CHI	3878.4	0.0002	0.9889			3772.8	2.3271	0.12714			7246.5	0.2435	0.621672
Manner	3879	0.569	0.45066			3772.2	1.706	0.1915			7247.5	1.2412	0.265236
End_State	3879.9	1.4565	0.22749			3771.6	1.1622	0.28101			7247.9	1.6479	0.199244
SSplattering	3878.6	0.1963	0.65775			3770.7	0.2675	0.60502			7246.2	0.016	0.899499
SJoining	3878.6	0.139	0.7093			3770.8	0.307	0.57953			7246.8	0.6006	0.438347
SStacking	3878.6	0.1911	0.66197			3771.2	0.6906	0.40594			7247.1	0.8393	0.359603
SGluing	3880	1.5425	0.21424			3772.1	1.5973	0.20628			7251.3	5.0525	0.0245901	*
SSmearing	3879.6	1.1592	0.28164			3773.7	3.2057	0.07338	.		7247.7	1.4235	0.232832
	Age 5-6 DO Datives					Age 9-10 DO Datives					Adults DO Datives				Fig9
Predictor	AIC	ChiSq	p(Chi)	Sig		AIC	ChiSq	p(Chi)	Sig		AIC	ChiSq	p(Chi)	Sig
Full Model	2839.4					2503.5					5113.5
PRE_CHI	2838	0.5751	0.44826			2502.6	1.106	0.29295			5112.3	0.8664	0.35197		Fig10
ENT_DO	2842.1	4.7128	0.02994	*		2504.6	3.0518	0.08065	.		5113.5	2.0812	0.14913		Fig11
BROAD_PO	2837.6	0.2091	0.64751			2502.3	0.7914	0.37367			5111.6	0.1582	0.6908		Fig12
BROAD_DO_1	2842.7	5.3137	0.02116	*		2506.2	4.6842	0.03044	*		5118	6.554	0.01046	*	Fig13
BROAD_DO_2	2837.7	0.2481	0.6184			2501.5	0.0032	0.95513			5113	1.5328	0.2157
SPEECH	2837.8	0.4143	0.5198			2502.7	1.1917	0.27499			5115.2	3.699	0.05445	.	Fig14
MAILING	2838.9	1.4659	0.22599			2502.3	0.7862	0.37526			5112.6	1.151	0.28334		Fig15
BEQUEATHING	2838.5	1.0698	0.30099			2502.5	0.9446	0.33109			5111.6	0.1178	0.73141
MOTION	2837.9	0.5106	0.47486			2502.9	1.3294	0.24892			5115.8	4.2944	0.03824	*	Fig16
LATINATE	2842.1	4.6943	0.03026	*		2503.8	2.2981	0.12954			5112.7	1.2418	0.26512		Fig17
	Age 5-6 PO Datives					Age 9-10 PO Datives					Adults PO Datives				Fig9
Predictor	AIC	ChiSq	p(Chi)	Sig		AIC	ChiSq	p(Chi)	Sig		AIC	ChiSq	p(Chi)	Sig
Full Model	2701					2210.3					4627.6
PRE_CHI	2699.6	0.6284	0.42795			2208.3	0.046	0.830243			4625.6	0.0315	0.85902		Fig10
ENT_DO	2699.3	0.3396	0.56004			2208.4	0.0922	0.761388			4625.6	0.0642	0.79992		Fig11
BROAD_PO	2699.3	0.267	0.60538			2210.9	2.6284	0.104967			4626.4	0.7699	0.38025		Fig12
BROAD_DO_1	2699	0.0162	0.8987			2213	4.6905	0.03033	*		4631.5	5.9566	0.01466	*	Fig13
BROAD_DO_2	2700.5	1.5196	0.21768			2208.5	0.2179	0.640664			4625.6	0.0034	0.95329
SPEECH	2699.2	0.1832	0.66867			2209.1	0.8296	0.362375			4627.2	1.6318	0.20146		Fig14
MAILING	2699.4	0.4258	0.51408			2211.7	3.4081	0.064879	.		4629.8	4.1695	0.04116	*	Fig15
BEQUEATHING	2699.1	0.0516	0.82035			2209.4	1.1541	0.282699			4627.1	1.4862	0.22281
MOTION	2699.2	0.1767	0.67424			2208.5	0.254	0.614268			4626.4	0.8245	0.36388		Fig16
LATINATE	2704.1	5.0681	0.02437	*		2214.9	6.6562	0.009881	**		4628.7	3.1103	0.0778	.	Fig17
	Age 5-6 Datives Difference Scores					Age 9-10 PO Datives Difference Scores					Adults PO Datives Difference Scores				Fig18
Predictor	AIC	ChiSq	p(Chi)	Sig		AIC	ChiSq	p(Chi)	Sig		AIC	ChiSq	p(Chi)	Sig
Full Model	3036.2					2639.2					5577.8
PRE_CHI	3036.5	2.2728	0.131661			2646.2	8.9116	0.002834	**		5582.4	6.5765	0.010333	*
ENT_CHI	3039.4	5.1681	0.023006	*		2643.1	5.8758	0.015351	*		5578.7	2.9502	0.085866	.
BROAD_PO	3035.7	1.4286	0.232			2641.7	4.462	0.034657	*		5576.8	1.0154	0.31361
BROAD_DO_1	3041.1	6.8525	0.008852	**		2638.3	1.0217	0.312107			5577	1.2142	0.270497
BROAD_DO_2	3038.6	4.3537	0.036929	*		2637.3	0.0518	0.819893			5577.9	2.0974	0.147552
SPEECH	3034.6	0.3292	0.566156			2640.1	2.8424	0.091806	.		5583.3	7.469	0.006277	**
MAILING	3040.4	6.1445	0.013182	*		2642	4.7174	0.029859	*		5581.7	5.9527	0.014695	*
BEQUEATHING	3037.1	2.8267	0.092707	.		2637.6	0.3376	0.561241			5575.9	0.0799	0.777485
MOTION	3034.3	0.0646	0.799425			2637.9	0.6282	0.428024			5578.5	2.6805	0.101584
LATINATE	3034.3	0.0638	0.800583			2637.3	0.0975	0.754812			5575.8	0.0333	0.855131
	Age 5-6 Various Constructions Raw Scores					Age 9-10 Various Constructions Raw Scores					Adults Various Constructions Raw Scores				Fig19
Predictor	AIC	ChiSq	p(Chi)	Sig		AIC	ChiSq	p(Chi)	Sig		AIC	ChiSq	p(Chi)	Sig
Full Model	11668					9963.1					9030.9
PRE_CHI_DIR	11667	1.3268	0.2494			9963	1.8941	0.16874			9029.3	0.4418	0.50624		Fig20
ENT_CHI_DIR	11668	2.5167	0.1126			9965.3	4.2128	0.04012	*		9034.7	5.8557	0.01553	*	Fig21
	Age 5-6 Various Constructions Difference Scores					Age 9-10 Various Constructions Difference Scores					Adults Various Constructions Difference Scores
Predictor	AIC	ChiSq	p(Chi)	Sig		AIC	ChiSq	p(Chi)	Sig		AIC	ChiSq	p(Chi)	Sig	Fig22
Full Model	5538					4660.2					4074.5
PRE_CHI_DIR	5536.9	0.9026	0.3421			4660.9	2.6707	0.10221			4076.6	4.0625	0.04385	*
ENT_CHI_DIR	5538.7	2.6309	0.1048			4662.2	4.0383	0.04448	*		4076.4	3.9329	0.04735	*
	Age 5-6 Un- Prefixation Raw Scores					Age 9-10 Un- Prefixation Raw Scores					Adults Un- Prefixation Raw Scores				Fig23
Predictor	AIC	ChiSq	p(Chi)	Sig		AIC	ChiSq	p(Chi)	Sig		AIC	ChiSq	p(Chi)	Sig
Full Model	2525					817.09					1458
Preemption	2525.6	2.6607	0.102853			826.83	11.7369	0.0006127	***		1465	8.9499	0.002775	**	Fig24
Entrenchment	2523.3	0.356	0.550715			815.15	0.0618	0.803696			1461.4	5.3736	0.020444	*	Fig25
Rating_bare_form	2526.4	3.4715	0.0624358	.		819.17	4.0794	0.0434099	*		1462.2	6.2057	0.012734	*	Fig26
Reversibility	2523	0.0001	0.994042			823.62	8.5344	0.0034849	**		1460.1	4.0719	0.043603	*	Fig27
Semantics	2535.1	12.1159	0.0004999	***		834.06	18.9732	1.326e-05	***		1462.5	6.5191	0.010672	*	Fig28
	Age 5-6 Un- Prefixation Difference Scores					Age 9-10 Un- Prefixation Difference Scores					Adults Un- Prefixation Difference Scores
Predictor	AIC	ChiSq	p(Chi)	Sig		AIC	ChiSq	p(Chi)	Sig		AIC	ChiSq	p(Chi)	Sig	Fig29
Full Model	2919.5					894.46					1531.8
Preemption	2917.7	0.1478	0.700683			897.72	5.2627	0.0217867	*		1537.1	7.3315	0.006776	**
Entrenchment	2924.7	7.1762	0.007388	**		894.76	2.3012	0.129273			1536.5	6.6942	0.009673	**
Reversibility	2918	0.4669	0.494418			898.05	5.5927	0.0180355	*		1534.1	4.348	0.037053	*
Semantics	2922.3	4.8049	0.028379	*		903.95	11.4896	0.0006999	***		1533.2	3.4861	0.061886	.
New Study. Verbs with suggested Preempting forms
(N=60). Raw Scores						Difference Scores									Fig30,36
Predictor	AIC	ChiSq	p(Chi)	Sig		AIC	ChiSq	p(Chi)	Sig
Full Model	8545.1					8547
Preemption	8550.5	7.3572	0.00668	**		8552.5	7.4985	0.006175	**						Fig31
Entrenchment	8548.5	5.3978	0.020163	*		8550.3	5.2759	0.021623	*						Fig32
Rating_bare_form	8548.5	5.3722	0.02046	*											Fig33
Reversibility	8560.2	17.1169	3.515e-05	***		8562.3	17.2422	3.29e-05	***						Fig34
Semantics	8551.1	7.9949	0.004691	**		8553.3	8.209	0.004168	**						Fig35
New Study. All Verbs (N=160). Raw Scores
Peempton = Has Competing Alternative?						Difference Scores									Fig37,43
Predictor	AIC	ChiSq	p(Chi)	Sig		AIC	ChiSq	p(Chi)	Sig
Full Model	23294					23363
Has_CA	23311	18.219	1.969e-05	***		23377	16.227	5.62e-05	***						Fig38,44
Entrenchment	23389	96.885	2.2e-16	***		23453	92.014	2.2e-16	***						Fig39
Rating_bare_form	23330	38.05	6.896e-10	***											Fig40
Reversibility	23315	22.291	2.342e-06	***		23383	21.949	2.801e-06	***						Fig41
Semantics	23301	8.276	0.004017	**		23370	8.364	0.003827	**						Fig42
New Study. Verbs with No suggested Prempting forms															Fig45, 50
(N=100). Raw Scores						Difference Scores
Full Model	14818					16495
Entrenchment	14882	65.237	6.64e-16	***		16566	72.497	2.2e-16	***						Fig46
Rating_bare_form	14860	43.807	3.625e-11	***											Fig47
Reversibility	14827	10.227	0.001384	**		16501	8.01	0.004653	**	.					Fig48
Semantics	14820	3.892	0.048514	*		16496	2.959	0.085403	.						Fig49
